# Supplementary material
Source: MDPI journal article supplement (https://www.mdpi.com/2311-7524/8/6/537)
Supplement: s1 [file s1]

**Supplemental Table S4.** The identity of CCR protein sequences from peppers and CCRs from other plant species

*AtCCR1*(NP\_001319013.1)\*AtCCR2*(AAG53687.1)\*BoCCR1*(XP\_013611404.1)\*BoCCR2*(XP\_013621398.1)\*StCCR1*(XP\_006356249.1)/ *StCCR2*(XP\_006342181.1)/*SICCR* ( NP\_001234612.1)/*Sl CCR2*(NP\_001234297.1)/*HvCCR1*(XP\_044948571.1)/*HvCCR2*((KAE8782947.1))/ *ZmCCR1*(*Zea mays*) (NP\_001105488.1)/ *ZmCCR2*(*Zea mays*) (NP\_001105715)/ *OsCCR1*(*Oryza sativa Japonica*) (XP\_015621618.1)/ *SbCCR1*(*Sorghum bicolor*)( XP\_021306123.1)/ *SbCCR2*(*Sorghum bicolor*) (XP\_021312001.1)/ *PvCCR1a*(*Panicum virgatum*) (XP\_039814571.1)/ *PvCCR2a*(*Panicum virgatum*) (ACZ74585.1)/ *PtCCR2*(*Populus trichocarpa*) (XP\_002300619.2)/ *EugCCR*(*Eucalyptus gunnii*) (CAA56103.1)/ *PtCCR*(*Pinus taeda*)( AAL47684.1)

|                | <i>At</i><br><i>CCR1</i> | <i>At</i><br><i>CCR2</i> | <i>Bo</i><br><i>CCR1</i> | <i>Bo</i><br><i>CCR2</i> | <i>St</i><br><i>CCR1</i> | <i>St</i><br><i>CCR2</i> | <i>Hv</i><br><i>CCR1</i> | <i>Hv</i><br><i>CCR2</i> | <i>Zm</i><br><i>CCR1</i> | <i>Zm</i><br><i>CCR2</i> | <i>Os</i><br><i>CCR1</i> | <i>Os</i><br><i>CCR2</i> | <i>Sb</i><br><i>CCR1</i> | <i>Sb</i><br><i>CCR2</i> | <i>Pv</i><br><i>CCR1a</i> | <i>Pv</i><br><i>CCR2a</i> | <i>Pt</i><br><i>CCR2</i> | <i>Egu</i><br><i>CCR</i> | <i>Pt</i><br><i>CCR</i> |
|----------------|--------------------------|--------------------------|--------------------------|--------------------------|--------------------------|--------------------------|--------------------------|--------------------------|--------------------------|--------------------------|--------------------------|--------------------------|--------------------------|--------------------------|---------------------------|---------------------------|--------------------------|--------------------------|-------------------------|
| CaCCR1-1       | 40.3                     | 5.0                      | 71.3                     | 40.2                     | 5.3                      | 41.2                     | 60.6                     | 5.7                      | 37.1                     | 40.6                     | 42.7                     | 36.8                     | 37.6                     | 45.2                     | 38.4                      | 36.0                      | 40.7                     | 43.3                     | 46.7                    |
| CaCCR1-2       | 25.1                     | 23.4                     | 20.0                     | 23.2                     | 26.0                     | 21.9                     | 20.2                     | 43.6                     | 23.7                     | 23.7                     | 19.3                     | 17.4                     | 21.8                     | 16.6                     | 22.7                      | 19.7                      | 25.1                     | 26.0                     | 26.5                    |
| CaCCR1-like1   | 75.3                     | 74.0                     | 45.9                     | 74.3                     | 90.1                     | 44.7                     | 40.2                     | 25.3                     | 62.5                     | 66.4                     | 45.1                     | 37.9                     | 42.9                     | 32.2                     | 64.6                      | 55.3                      | 44.3                     | 81.1                     | 70.1                    |
| CaCCR1-like2   | 73.8                     | 73.7                     | 45.3                     | 74.6                     | 87.4                     | 43.5                     | 41.0                     | 25.6                     | 61.7                     | 65.5                     | 44.5                     | 37.1                     | 42.6                     | 32.0                     | 64.6                      | 54.5                      | 43.4                     | 80.2                     | 69.2                    |
| CaCCR1-like3   | 45.9                     | 45.1                     | 46.2                     | 45.3                     | 47.2                     | 42.2                     | 42.9                     | 23.4                     | 40.3                     | 41.1                     | 68.0                     | 34.9                     | 40.7                     | 34.3                     | 41.6                      | 37.9                      | 38.5                     | 45.5                     | 46.8                    |
| CaCCR1-like4   | 47.9                     | 44.7                     | 48.0                     | 44.8                     | 47.2                     | 42.5                     | 43.8                     | 20.1                     | 41.6                     | 42.8                     | 67.1                     | 33.0                     | 39.0                     | 33.7                     | 43.0                      | 37.3                      | 38.1                     | 46.7                     | 47.2                    |
| CaCCR1-like5   | 15.6                     | 16.5                     | 13.9                     | 15.7                     | 14.7                     | 16.0                     | 15.2                     | 10.6                     | 12.9                     | 14.3                     | 18.6                     | 12.9                     | 14.0                     | 12.7                     | 13.1                      | 12.5                      | 16.5                     | 15.1                     | 15.1                    |
| CaCCR1-like6   | 39.4                     | 38.9                     | 38.2                     | 38.5                     | 41.7                     | 40.5                     | 36.7                     | 21.1                     | 34.3                     | 35.7                     | 50.6                     | 30.8                     | 36.1                     | 31.4                     | 35.2                      | 32.0                      | 40.0                     | 39.2                     | 41.0                    |
| CaCCR1-like7   | 42.9                     | 40.9                     | 41.2                     | 40.5                     | 43.4                     | 42.1                     | 40.1                     | 21.7                     | 38.0                     | 38.9                     | 55.5                     | 33.4                     | 41.4                     | 33.2                     | 39.0                      | 33.7                      | 42.1                     | 41.8                     | 43.6                    |
| CaCCR1-like8   | 8.4                      | 8.7                      | 10.2                     | 8.5                      | 8.4                      | 17.5                     | 11.2                     | 7.8                      | 9.7                      | 8.5                      | 10.1                     | 7.5                      | 7.9                      | 9.3                      | 9.6                       | 7.0                       | 12.5                     | 9.5                      | 10.8                    |
| CaCCR1-like9   | 24.6                     | 24.0                     | 25.9                     | 24.0                     | 27.4                     | 25.1                     | 26.1                     | 25.9                     | 27.0                     | 24.4                     | 24.5                     | 19.7                     | 24.4                     | 20.2                     | 27.5                      | 21.5                      | 24.2                     | 28.2                     | 29.1                    |
| CaCCR1-like10A | 26.6                     | 26.2                     | 27.5                     | 27.1                     | 28.0                     | 28.5                     | 27.7                     | 25.1                     | 26.6                     | 25.9                     | 23.4                     | 22.6                     | 24.5                     | 23.9                     | 26.6                      | 23.5                      | 28.5                     | 28.1                     | 31.8                    |
| CaCCR1-like10B | 26.6                     | 26.0                     | 27.5                     | 27.1                     | 27.8                     | 28.5                     | 27.7                     | 25.4                     | 26.6                     | 25.7                     | 23.4                     | 22.0                     | 24.5                     | 22.7                     | 26.6                      | 23.3                      | 28.5                     | 28.1                     | 31.5                    |
| CaCCR2-1       | 37.3                     | 38.5                     | 50.3                     | 38.6                     | 41.8                     | 38.0                     | 49.7                     | 21.8                     | 36.0                     | 38.6                     | 39.8                     | 32.5                     | 39.0                     | 40.0                     | 38.0                      | 33.1                      | 38.3                     | 41.0                     | 41.0                    |
| CaCCR2-2       | 72.4                     | 71.8                     | 45.0                     | 72.9                     | 95.2                     | 45.3                     | 40.1                     | 24.8                     | 62.0                     | 65.8                     | 46.2                     | 36.7                     | 42.9                     | 31.6                     | 65.1                      | 54.8                      | 43.6                     | 81.6                     | 69.6                    |
| CaCCR2-like1   | 41.4                     | 40.4                     | 43.1                     | 40.5                     | 45.6                     | 90.0                     | 39.7                     | 24.0                     | 41.5                     | 43.1                     | 38.6                     | 47.7                     | 50.5                     | 32.3                     | 42.0                      | 36.8                      | 68.9                     | 44.0                     | 45.6                    |
| CaCCR2-like2   | 28.4                     | 28.1                     | 29.5                     | 27.9                     | 30.8                     | 29.9                     | 31.0                     | 27.7                     | 27.8                     | 27.8                     | 25.7                     | 24.1                     | 25.9                     | 25.5                     | 27.7                      | 22.6                      | 28.1                     | 31.3                     | 32.7                    |
| CaCCR2-like3   | 70.1                     | 71.8                     | 43.1                     | 73.9                     | 82.3                     | 43.4                     | 37.1                     | 23.9                     | 59.3                     | 65.3                     | 45.2                     | 35.5                     | 41.3                     | 32.0                     | 61.8                      | 54.8                      | 42.0                     | 76.3                     | 66.2                    |
| CaCCR2-like4   | 21.8                     | 21.1                     | 21.7                     | 21.2                     | 24.9                     | 22.3                     | 22.2                     | 22.1                     | 22.9                     | 20.3                     | 20.2                     | 17.0                     | 19.0                     | 15.9                     | 23.3                      | 19.3                      | 20.9                     | 25.1                     | 25.2                    |
| CaDFR-1        | 32.5                     | 31.4                     | 30.7                     | 31.4                     | 33.5                     | 32.2                     | 30.6                     | 20.2                     | 32.3                     | 32.3                     | 29.3                     | 25.6                     | 28.7                     | 24.4                     | 32.6                      | 28.9                      | 28.7                     | 35.1                     | 33.0                    |
| CaDFR-like     | 23.9                     | 25.9                     | 21.4                     | 26.0                     | 25.1                     | 21.0                     | 23.5                     | 38.6                     | 23.6                     | 24.0                     | 20.3                     | 20.5                     | 22.1                     | 19.2                     | 24.9                      | 19.1                      | 23.3                     | 24.9                     | 25.4                    |
|                |                          |                          |                          |                          |                          |                          |                          |                          |                          |                          |                          |                          |                          |                          |                           |                           |                          |                          |                         |
| CbCCR1-1       | 68.7                     | 70.9                     | 42.5                     | 73.0                     | 81.7                     | 43.1                     | 37.1                     | 23.2                     | 59.6                     | 64.5                     | 45.5                     | 35.0                     | 40.7                     | 32.0                     | 61.3                      | 54.2                      | 42.0                     | 76.0                     | 66.2                    |
| CbCCR1-2       | 47.9                     | 44.7                     | 48.0                     | 44.8                     | 47.2                     | 42.5                     | 44.6                     | 20.1                     | 41.6                     | 42.8                     | 66.8                     | 33.0                     | 39.0                     | 33.7                     | 43.2                      | 37.9                      | 38.1                     | 46.7                     | 47.2                    |
| CbCCR1-3       | 45.9                     | 45.1                     | 46.5                     | 45.3                     | 47.5                     | 42.2                     | 43.8                     | 22.8                     | 40.6                     | 41.1                     | 68.3                     | 34.6                     | 40.7                     | 34.9                     | 41.9                      | 55.0                      | 38.5                     | 45.2                     | 47.1                    |
| CbCCR2-1       | 72.7                     | 71.8                     | 45.0                     | 72.9                     | 95.5                     | 45.3                     | 40.4                     | 24.8                     | 62.0                     | 65.8                     | 46.5                     | 36.7                     | 42.8                     | 32.1                     | 65.1                      | 55.6                      | 43.6                     | 81.9                     | 70.0                    |
| CbCCR2-2       | 75.6                     | 73.7                     | 46.2                     | 74.9                     | 90.7                     | 45.0                     | 40.2                     | 24.4                     | 63.7                     | 66.7                     | 45.7                     | 38.2                     | 42.6                     | 32.2                     | 65.1                      | 55.6                      | 44.3                     | 82.0                     | 70.1                    |

|          |      |      |      |      |      |      |      |      |      |      |      |      |      |      |      |      |      |      |      |
|----------|------|------|------|------|------|------|------|------|------|------|------|------|------|------|------|------|------|------|------|
| CbCCR2-3 | 63.0 | 61.9 | 38.5 | 62.7 | 73.6 | 36.8 | 34.3 | 25.4 | 55.8 | 57.7 | 38.5 | 31.4 | 36.1 | 27.6 | 58.0 | 46.9 | 36.3 | 68.0 | 59.4 |
| CbDFR-1  | 13.1 | 12.6 | 11.3 | 11.3 | 14.4 | 13.6 | 13.3 | 12.6 | 12.4 | 12.8 | 11.7 | 11.4 | 11.9 | 13.1 | 13.0 | 12.8 | 14.0 | 13.1 | 11.8 |
| CbDFR-2  | 32.7 | 31.4 | 30.4 | 30.7 | 33.5 | 32.2 | 30.3 | 20.0 | 32.6 | 32.3 | 29.3 | 25.6 | 28.7 | 24.2 | 32.6 | 28.9 | 28.7 | 34.0 | 33.0 |
|          |      |      |      |      |      |      |      |      |      |      |      |      |      |      |      |      |      |      |      |
| CcCCR1-1 | 45.9 | 45.1 | 46.2 | 45.3 | 47.2 | 42.2 | 43.5 | 22.8 | 40.3 | 41.1 | 68.0 | 34.9 | 40.7 | 34.3 | 41.6 | 37.9 | 38.5 | 45.5 | 46.8 |
| CcCCR1-2 | 47.9 | 44.7 | 48.0 | 44.8 | 47.2 | 42.5 | 44.6 | 20.1 | 41.6 | 42.8 | 67.1 | 33.0 | 39.0 | 33.7 | 43.2 | 37.3 | 38.1 | 46.7 | 47.2 |
| CcCCR1-3 | 69.0 | 70.9 | 43.1 | 73.0 | 81.7 | 44.0 | 37.7 | 23.7 | 58.8 | 64.7 | 44.4 | 35.3 | 40.7 | 32.0 | 61.0 | 54.5 | 42.0 | 75.7 | 65.9 |
| CcCCR1-4 | 38.5 | 36.6 | 23.5 | 37.1 | 47.2 | 23.3 | 21.1 | 13.9 | 34.6 | 34.1 | 24.8 | 19.2 | 22.0 | 16.9 | 35.2 | 29.9 | 22.4 | 41.6 | 36.4 |
| CcCCR2-1 | 75.9 | 74.3 | 46.2 | 75.2 | 90.4 | 44.7 | 40.2 | 25.6 | 62.8 | 66.4 | 46.0 | 37.9 | 42.6 | 31.7 | 65.1 | 55.3 | 44.0 | 81.7 | 70.1 |
| CcCCR2-2 | 74.1 | 74.0 | 45.6 | 74.9 | 87.7 | 43.5 | 41.3 | 24.4 | 61.5 | 65.8 | 45.1 | 37.1 | 42.6 | 32.2 | 64.8 | 55.6 | 43.4 | 80.5 | 68.9 |
| CcDFR-1  | 8.4  | 9.3  | 9.3  | 9.4  | 8.1  | 7.8  | 6.7  | 4.3  | 8.4  | 7.9  | 11.9 | 8.0  | 9.1  | 5.5  | 8.5  | 7.6  | 8.5  | 7.7  | 7.7  |
| CcDFR-2  | 32.2 | 30.9 | 30.4 | 30.4 | 32.7 | 32.2 | 30.0 | 20.2 | 33.3 | 33.3 | 29.1 | 25.6 | 29.0 | 24.4 | 34.4 | 29.2 | 28.7 | 35.1 | 33.8 |
| CcDFR-3  | 6.1  | 7.2  | 6.2  | 7.9  | 5.7  | 7.5  | 6.4  | 4.0  | 6.0  | 6.2  | 6.3  | 4.6  | 4.8  | 5.8  | 6.0  | 4.6  | 7.2  | 6.6  | 6.5  |
